# Supplementary material for: The metal-nonoate Ni(SalPipNONO) inhibits in vitro tumor growth, invasiveness and angiogenesis
Source: PubMed Central journal article supplement (PMC5862583; doi:10.18632/oncotarget.24350), 2018-01-30
Supplement: oncotarget-09-13353-s001.pdf [file oncotarget-09-13353-s001.pdf]

# The metal-nonoate Ni(SalPipNONO) inhibits *in vitro* tumor growth, invasiveness and angiogenesis

## SUPPLEMENTARY MATERIALS

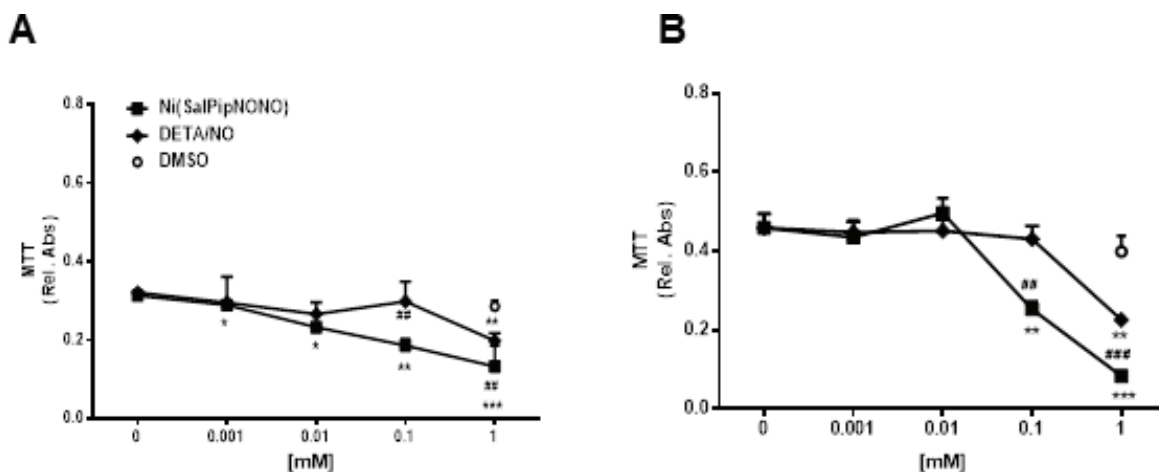

**Supplementary Figure 1: Ni(SalPipNONO) dose dependently inhibits tumor cell growth.** HT29 colon cancer cells were treated with increasing concentrations of NO donors (0.001–1 mM) in the presence of 0.1% (A) and 2% (B) serum and cell viability was evaluated by MTT after 72 h. Data are reported as relative absorbance ± SD (n = 3). The effect of 1% DMSO (vehicle of the NO donors) was tested as control. \*p < 0.05, \*\*p < 0.01 and \*\*\*p < 0.001 vs untreated cells. #p < 0.05, ##p < 0.01 and ###p < 0.001 Ni(SalPipNONO) vs DETA/NO.

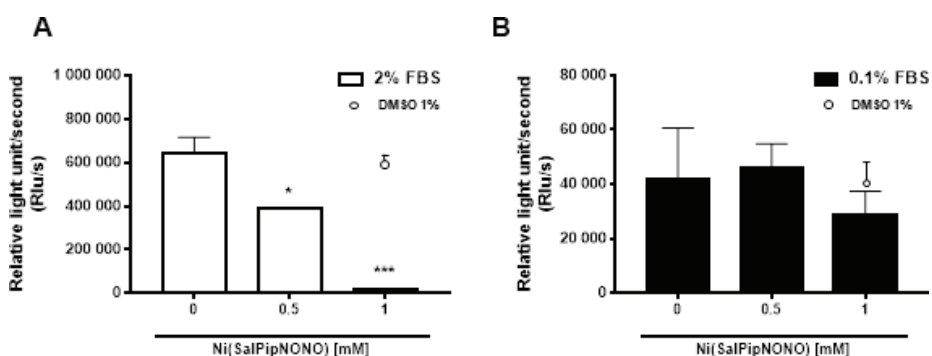

**Supplementary Figure 2: Effect of Ni(SalPipNONO) on normal cells.** The effect of Ni(SalPipNONO) was evaluated on human normal cells (HaCaT keratinocytes) by BrdU incorporation assay. Two different experimental conditions were assessed, one ((A) white columns, 2% FBS) with sparse and growing cells and the other ((B) black columns) with confluent cells exposed to low serum (0.1% FBS). (n = 3) \*p < 0.05 and \*\*\*p < 0.001 vs untreated cells.
